# Supplementary material
Source: PubMed Central journal article supplement (PMC4394780)
Supplement: AAC.04207-14_zac005153920so1.pdf [file AAC.04207-14_zac005153920so1.pdf]

Supplementary Fig.

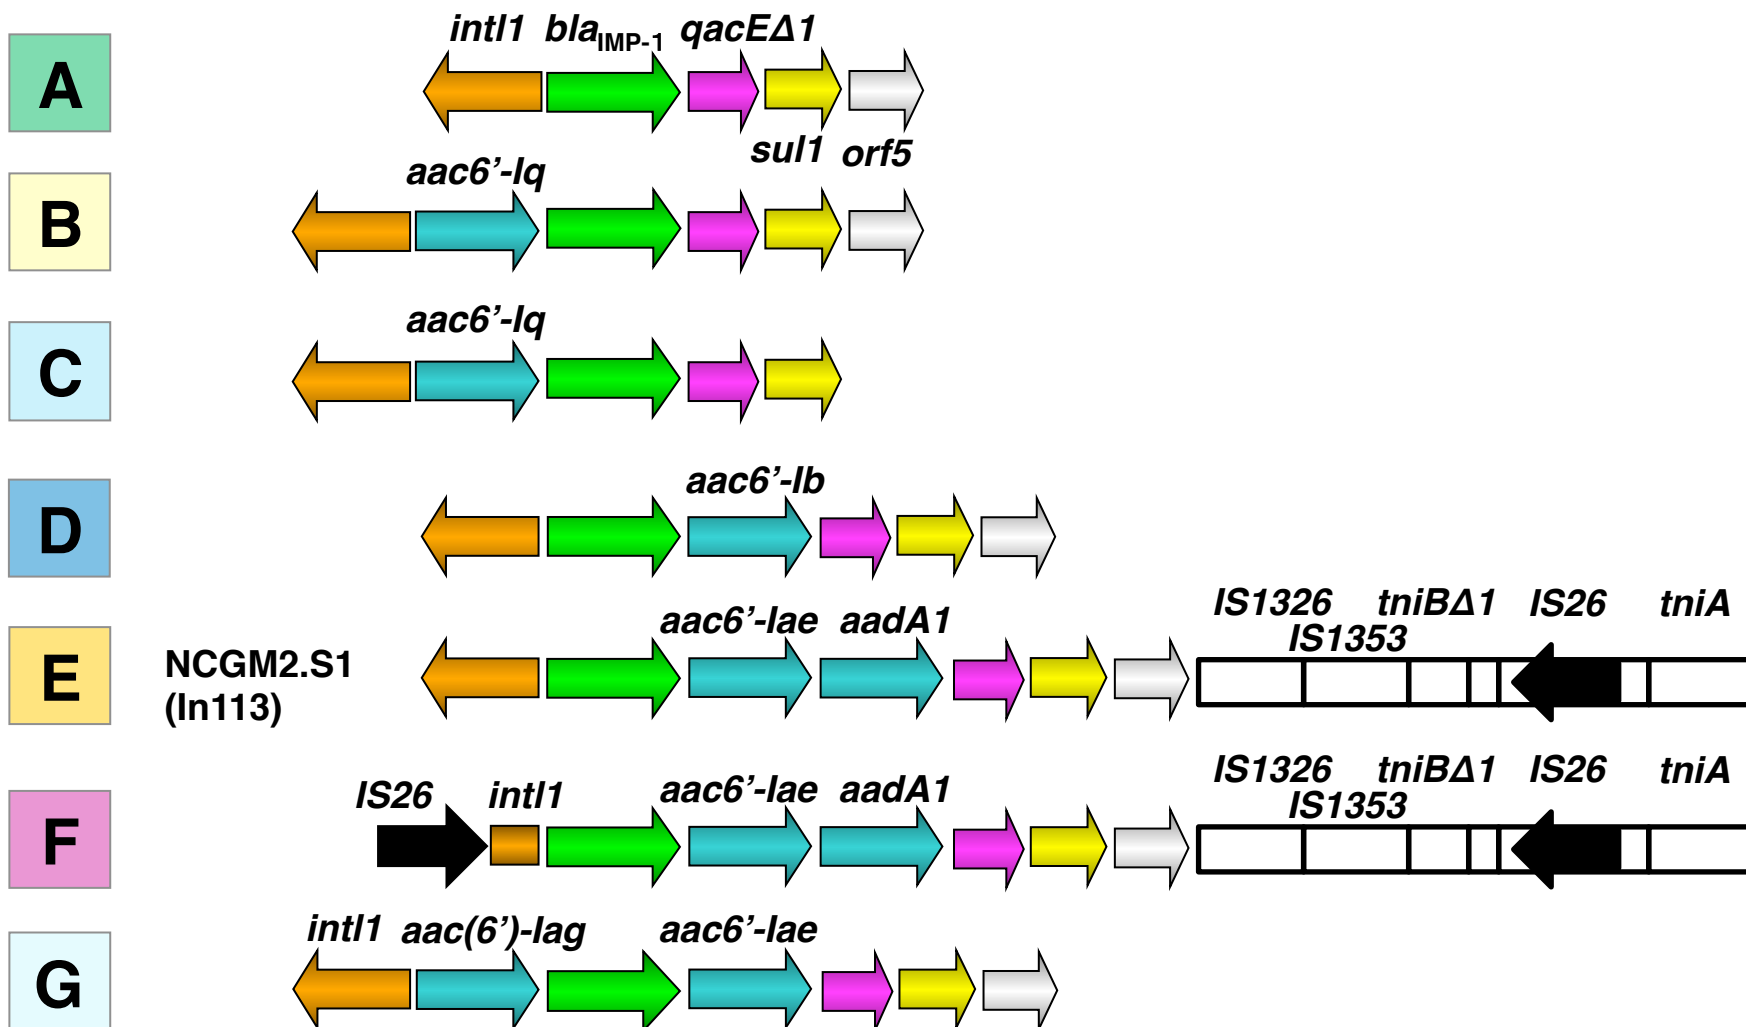

**Supplementary Figure.** Schematic representation of the genetic content in the *bla*<sub>IMP-1</sub> and *bla*<sub>VIM-2</sub> integrons. ORFs are shown as arrows indicating the orientation of the coding sequence with the gene name. *intl*, integrase; *aac*, aminoglycoside acetyltransferase; *aad*, aminoglycoside adenyltransferase; *qacEΔ1*, QacEΔ1 multidrug exporter; *sul*, Sul1 dihydropteroate synthase; *orf5*, hypothetical protein; and IS, insertion sequence.
